# Supplementary material for: The Mbd1-Atf7ip-Setdb1 pathway contributes to the maintenance of X chromosome inactivation
Source: PubMed Central journal article supplement (PMC4099106; doi:10.1186/1756-8935-7-12), 2014-06-26

# Supplemental Figure 1

**A**

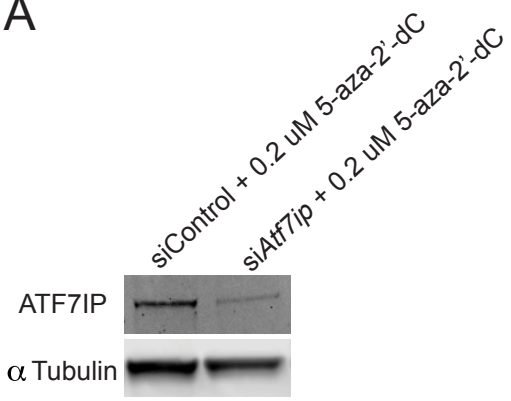

**B**

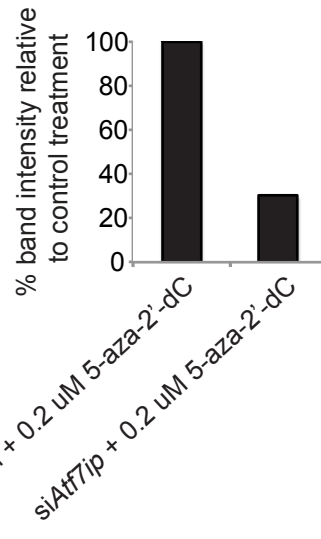

**C**

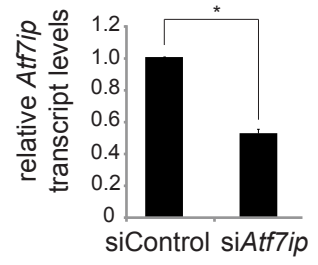

**D**

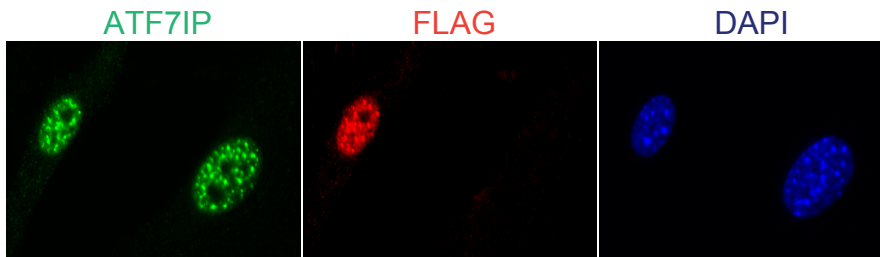

**E**

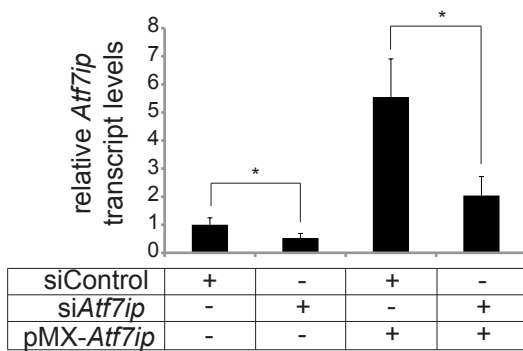

Supplement: 1756-8935-7-12-S1.pdf [file 1756-8935-7-12-S1.pdf]
