# Supplementary material for: The Mbd1-Atf7ip-Setdb1 pathway contributes to the maintenance of X chromosome inactivation
Source: PubMed Central journal article supplement (PMC4099106; doi:10.1186/1756-8935-7-12), 2014-06-26

# Supplemental Figure 5

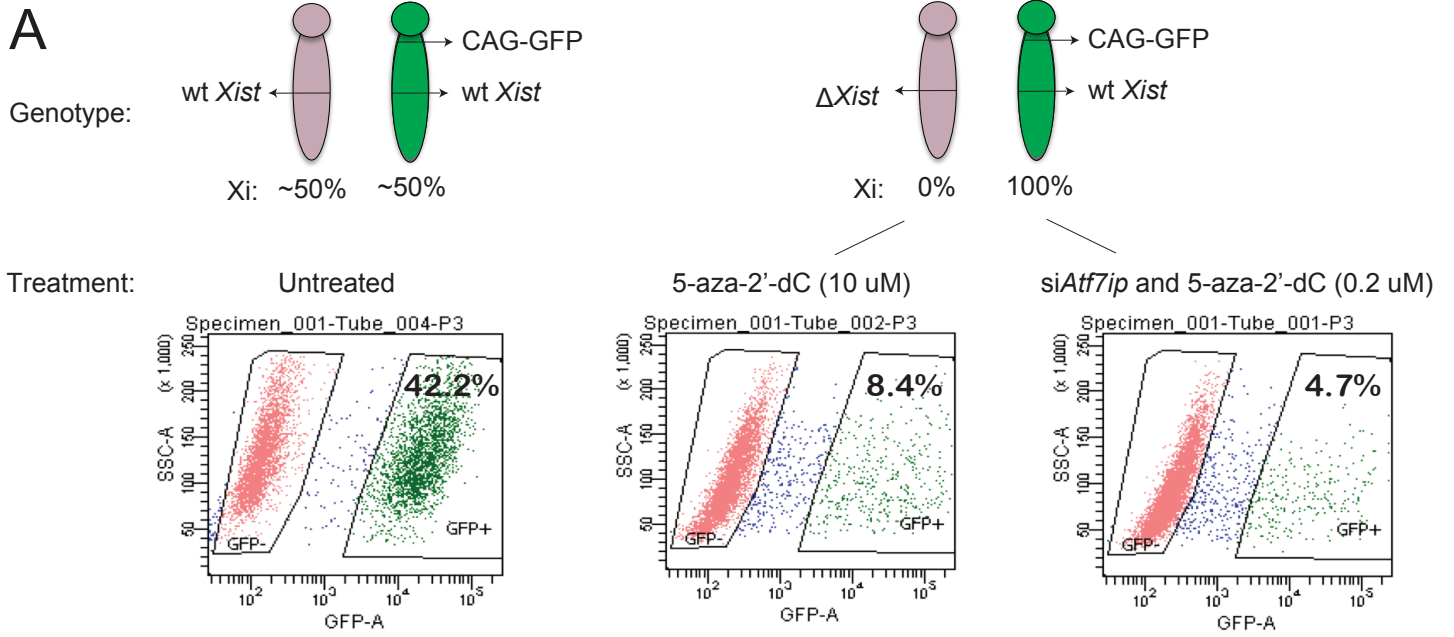

**B**

**i**

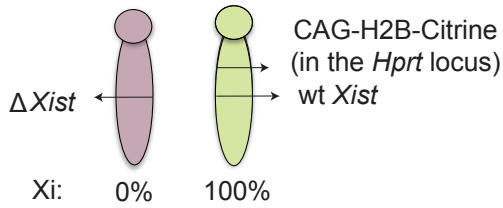

**ii**

% citrine-positive cells

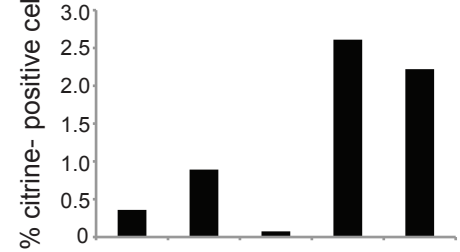

|                            |   |   |   |   |   |
|----------------------------|---|---|---|---|---|
| siControl                  | + | - | - | - | - |
| <i>siAtf7ip</i>            | - | + | - | + | - |
| 5-aza-2'-dC (0.2 $\mu$ M)  | - | - | + | + | - |
| 5-aza-2'-dC (10.0 $\mu$ M) | - | - | - | - | + |

**iii**

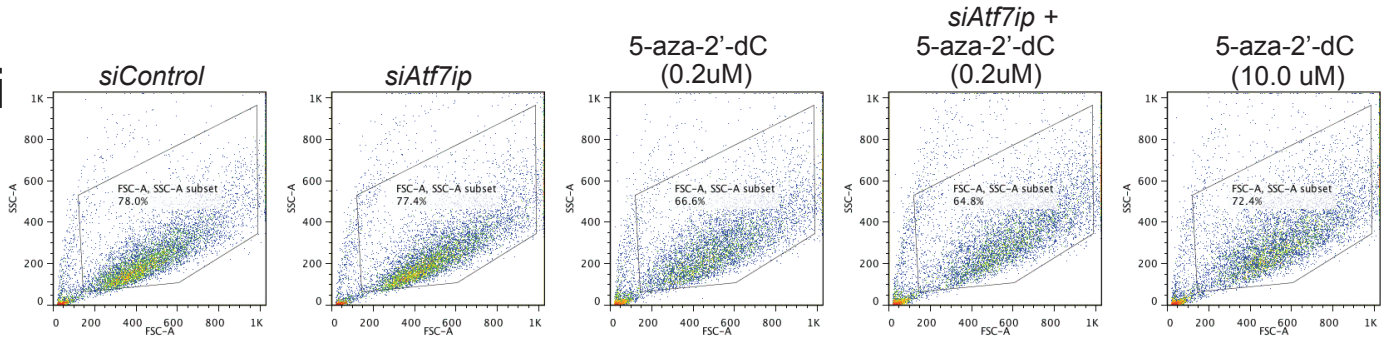

**iv**

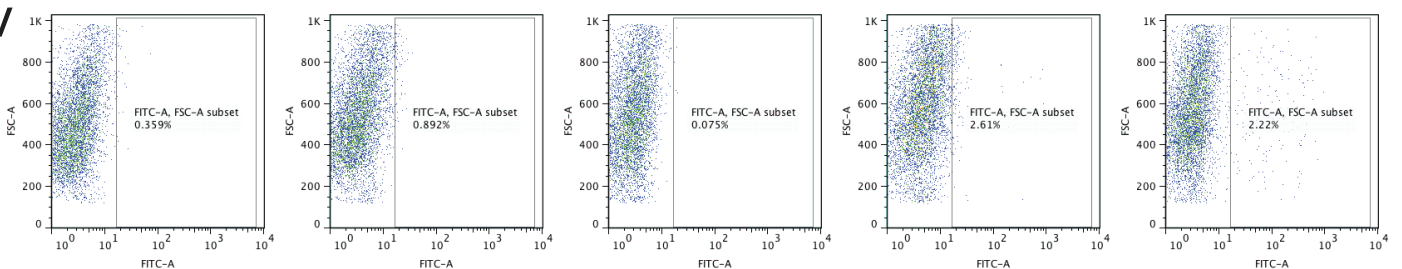

Supplement: 1756-8935-7-12-S5.pdf [file 1756-8935-7-12-S5.pdf]
